# Supplementary material for: Transcriptomic Profiling of the Tumor Microenvironment Reveals Distinct Subgroups of Clear Cell Renal Cell Cancer: Data from a Randomized Phase III Trial
Source: Oxford University Press journal article supplement (doi:10.1158/2159-8290.cd-18-0957), 2019-01-08
Supplement: 21598290cd180957-sup-206942_2_supp_5247253_pkgpk7.docx [file 21598290cd180957-sup-206942_2_supp_5247253_pkgpk7.docx]

**Supplementary Figure 1. Mutational count, somatic mutation frequency, and differential gene expression differences between clusters 4 and 1-3 and by objective response.** (**a**) Distribution of clusters by RECIST 1.0 objective response category. (**b**) Volcano plot demonstrating significantly differentially expressed genes when comparing response (PD vs. CR/PR) to TKI-therapy. (**c**) GSEA analysis of hallmark gene sets comparing PD to CR/PR.Enrichment scores are ranked based on the normalized enrichment score (NES) and sized by log10 transformed value of nominal p-value and asterisk indicate adjusted p<0.05. (**d)** Results of IPA canonical pathway analyses demonstrated significantly altered canonical pathways when comparing PD vs CR/PR. (**e**) Summary of IPA biological functions or disease analyses demonstrating gene enrichment in immune related functions or disease. (**f**) Demonstrates total mutational count in cluster 4 versus clusters 1-3. (**g**) Demonstrates the percent frequency of mutated *PBRM1*, *BAP1*, and *TP53* in clusters 4 versus 1-3; p-values were derived from the Fisher’s exact test. TKI, Tyrosine kinase inhibitor; GSEA, gene set enrichment analysis; IPA, ingenuity pathway analysis; OS, overall survival; PFS, Progression-free survival. RECIST 1.0 objective response is categorized as: PD, progressive disease; CR, complete response; PR, partial response; or SD, stable disease.

**Supplemental Figure 2. *PBRM1* and *BAP1* mutants in the KIRC TCGA cohort demonstrate differences in angiogenesis gene expression.** (**a**)Kaplan-Meier analyses demonstrating the impact of angiogenesis score on OS and (**b**) PFS in cluster 4 of COMPARZ. Censored data are indicated by vertical tick marks in the curves. All *P* values are calculated by stratified log-rank test. All HR and CI values for PFS and OS were extracted from Cox proportional hazard regression models. (**c**)Demonstrates angiogenesis score by mutation status of *PBRM1* (*Left*) and (**d**) *BAP1* (*Right*) in the KIRC TCAG cohort. KIRC TCGA, clear cell RCC TCGA cohort; HR, hazard ratio; PFS, progression-free survival; OS, overall-survival; CI, confidence interval.

**Supplemental Figure 3. Effect of macrophage infiltration on TKI response and survival.** (**a**) Demonstrates the GSEA enrichment scores of inflammatory (*Left*) and IFN-γ (*Right*) pathways among clusters 4 compared to clusters 1-3. (**b**) Demonstrates GSEA enrichment score of macrophage genes in cluster 4 compared to clusters 1-3. (**c**) DEG volcano plot of cluster 4 versus clusters 1-3 with significantly upregulated genes involved in immune (blue) and macrophage (red) programs highlighted and the rest of genes (gray). (**d**)Demonstrates the proportion of PD-L1 positive macrophages (CD68) by IHC in cluster 4 compared to clusters 1-3. (**e**) Demonstrates difference in RECIST 1.0 objective response by macrophage score. (**f**) Kaplan-Meier analyses demonstrating the impact of macrophage score on PFS. (**g**) Kaplan-Meier analyses demonstrating the impact of type 2 macrophage infiltration on OS and PFS. (**h**) Kaplan-Meier analyses demonstrating the impact of type 1 and 2 macrophage infiltration on OS ad PFS. (**i**) Demonstrates difference in median macrophage score by IMDC risk grouping. IHC, immunohistochemistry, OS, overall survival; PFS, progression-free survival; DEG, differentially expressed genes; HR, hazard ratio; CI, confidence interval; IMDC, International Renal Cell Carcinoma Database Consortium. All HR and CI values for PFS and OS were extracted from Cox proportional hazard regression models. Sample number per group indicated below each graph**.** RECIST 1.0 objective response is categorized as: PD, progressive disease; CR, complete response; PR, partial response; or SD, stable disease.

**Supplemental Figure 4. Association of Angio and Macrophage groups with IMDC and objective response, validation in KIRC TCGA and CSF1R expression among clusters. (a**) Demonstrates gating strategy utilized to assess total immune and macrophage infiltration. (**b**)Distribution of Angiogenesishigh/lowMacrophagehigh/low gene expression, relative to the median, within each original cluster. (**c**) Distribution of Angiogenesishigh/lowMacrophagehigh/low gene expression, relative to the median, within IMDC risk group. (**d**) Demonstrates differences in CSF1R expression by Angio-Macrophage group. (**e**) Kaplan-Meier of Angiogenesis score (high vs low) and (**f**) Macrophage score (high vs low) (**f**) in relation to cancer-specific survival (CSS) in the KIRC TCGA cohort. CSF1R, colony-stimulating factor-1 receptor; IMDC, International Renal Cell Carcinoma Database Consortium; KIRC TCGA cohort, clear cell RCC TCGA cohort. Sample number per group indicated below each graph.

**Supplemental Figure 5. Angiogenesis and Macrophage score differences by type of TKI treatment.** (**a**) Kaplan-Meier analyses demonstrating the impact of angiogenesis score (Angiohigh vs Angiolow, based on median score) on OS among patients treated with sunitinib (*left*) and pazopanib (*right*). (**b**) Kaplan-Meier analyses demonstrating the impact of angiogenesis score (Angiohigh vs Angiolow, based on median score) on PFS among patients treated with sunitinib (*left*) and pazopanib (*right*).(**c**)Kaplan-Meier analyses demonstrating the impact of macrophage score (Macrophagehigh vs Macrophagelow, based on median score) on OS among patients treated with sunitinib (*left*) and pazopanib (*right*).(**d**) Kaplan-Meier analyses demonstrating the impact of macrophage score (Macrophagehigh vs Macrophagelow, based on median score) on PFS among patients treated with sunitinib (*left*) and pazopanib (*right*).TKI, tyrosine kinase inhibitor;OS, overall survival; PFS, Progression-free survival; all HR and CI values for PFS and OS were extracted from Cox proportional hazard regression models. Sample number per group indicated below each graph.
